# Supplementary material
Source: Springer Nature journal article supplement (https://www.springermedizin.de/resource/supplementary/12958_2004_188_MOESM6_ESM.pdf/9567332)

Percentage of COCs locate in

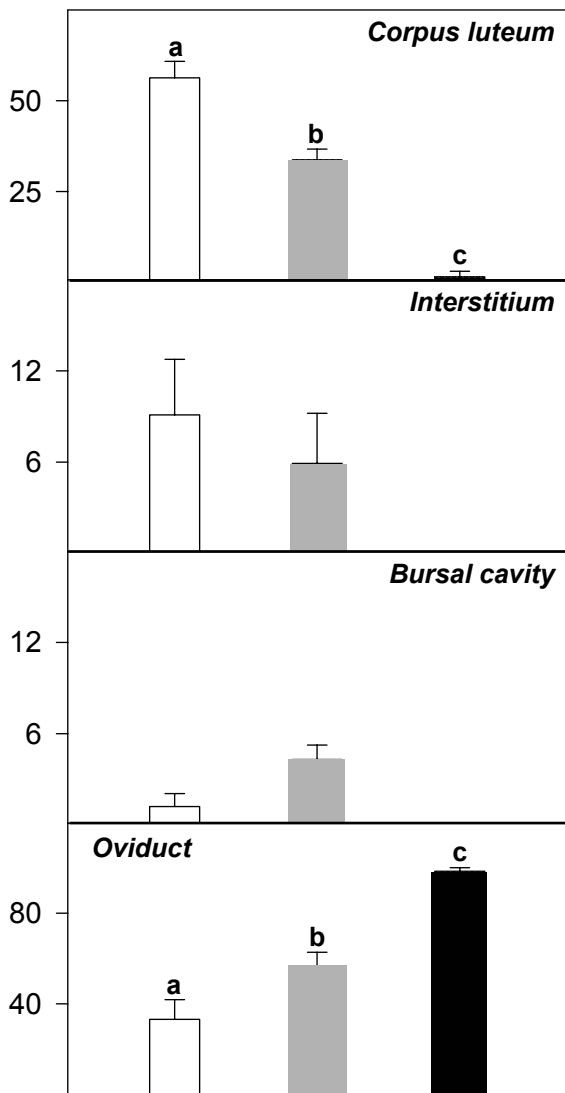

eCG treatment: 21 days      23 days      25 days  
Ovulation:      24 days      26 days      28 days

Supplement: MOESM6 [file 9567332]
